# Supplementary material
Source: Springer Nature journal article supplement (https://www.springermedizin.de/resource/supplementary/12911_2010_384_MOESM3_ESM.pdf/9525762)

Model for clusters **not including female** gender in any record

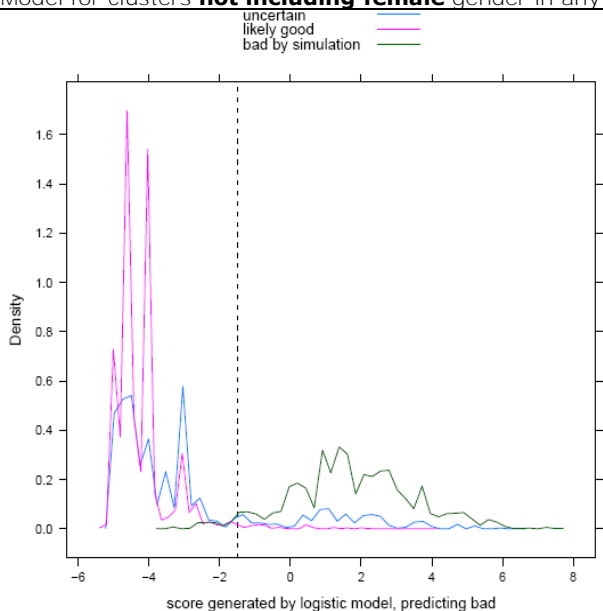

Model for clusters **including female** gender in any record

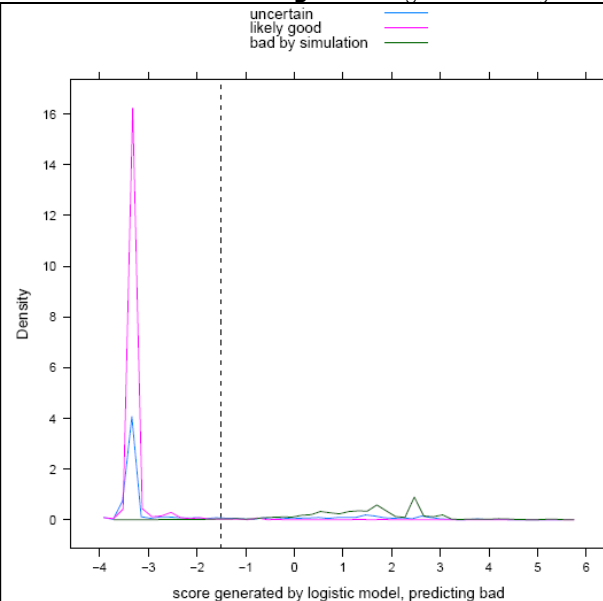

Supplement: MOESM3 [file 9525762]
